# Supplementary material
Source: MDPI journal article supplement (https://www.mdpi.com/1999-4907/9/11/707)
Supplement: s1 [file s1]

**Table S1.** Estimated GHG emissions (on a kg CO<sub>2</sub> ha<sup>-1</sup> basis) required to revegetate of tailings at CD area at the Vale waste management facility near Sudbury, Canada. Required activities and amendments were derived from descriptions the literature [9–11]. GHG emissions associated with each action were also obtained from the literature [76–78].

| Action Type                                        | Description                                                                    | Comments and Interpretations                                                                                                                                                                                                                                                                                                                                                                                                                                                    | GHG Emission Estimate, Units (Uncertainty) <sup>3</sup>                                                                                                                                                                                                                                                                                    | Amount of Action Occurring, Units (Uncertainty)                                                                                                                                                                                                                | GHG Emissions of Activity (Minimum, Maximum)                                                                                                                                                                  |
|----------------------------------------------------|--------------------------------------------------------------------------------|---------------------------------------------------------------------------------------------------------------------------------------------------------------------------------------------------------------------------------------------------------------------------------------------------------------------------------------------------------------------------------------------------------------------------------------------------------------------------------|--------------------------------------------------------------------------------------------------------------------------------------------------------------------------------------------------------------------------------------------------------------------------------------------------------------------------------------------|----------------------------------------------------------------------------------------------------------------------------------------------------------------------------------------------------------------------------------------------------------------|---------------------------------------------------------------------------------------------------------------------------------------------------------------------------------------------------------------|
| Amendment                                          | Fertilizer production                                                          | Estimated emissions from fertilizer production [77] Some uncertainty about specific fertilizer applied, (1) 5-20-20 (5 percent nitrogen, 20 percent phosphate, 20 percent potash) [9,10] or (2) 8-24-24 [11] Used as minimum and maximum ranges.                                                                                                                                                                                                                                | (1) N: 857.54 kg CO <sub>2</sub> Mg <sup>-1</sup> (±10%)<br>(2) P <sub>2</sub> O <sub>5</sub> : 165.09 kg CO <sub>2</sub> Mg <sup>-1</sup> (±10%)<br>(3) K <sub>2</sub> O: 120.28 kg CO <sub>2</sub> Mg <sup>-1</sup> (±10%)                                                                                                               | 750 kg ha <sup>-1</sup> (±10%)                                                                                                                                                                                                                                 | 67.5 to 113.1 kg CO <sub>2</sub> ha <sup>-1</sup>                                                                                                                                                             |
|                                                    | Agricultural Lime                                                              | (1) Production: Lime assumed of dolomitic origin [17]<br>(2) Dissolution: IPCC default assumes all C is released to atmosphere following application to soils, some research suggests lower value [78].                                                                                                                                                                                                                                                                         | (1) Production: 35.73 kg CO <sub>2</sub> Mg <sup>-1</sup> (±10%)<br>(2) Dissolution: 0.064 Mg CO <sub>2</sub> Mg <sup>-1</sup> (minimum [78])<br>0.13 Mg CO <sub>2</sub> Mg <sup>-1</sup> (maximum [78])                                                                                                                                   | 25 Mg ha <sup>-1</sup> (±10%)                                                                                                                                                                                                                                  | 2163.5 to 4655.1 kg CO <sub>2</sub> ha <sup>-1</sup>                                                                                                                                                          |
|                                                    | Seed production                                                                | (1) Grass seed: Mixture used [10,11] <sup>1</sup> does not match precisely with species for which emissions estimates for production are available [78]. Therefore a range of values are used.<br>(2) Legume seed: Various species <sup>2</sup> at different points in time. Specific estimates for these species not available, therefore used same range as estimates for grass seed.<br>(3) Fall rye seed: <i>Secale cereale</i> L., applied as a companion crop with grass. | (1) Grass seed: 0.54 kg CO <sub>2</sub> kg <sup>-1</sup> seed (minimum)<br>2.63 kg CO <sub>2</sub> kg <sup>-1</sup> seed (maximum)<br>(2) Legume seed: Used same range of estimates as grass seed<br>(3) Fall rye seed: 0.11 kg CO <sub>2</sub> kg <sup>-1</sup> seed (minimum)<br>0.13 kg CO <sub>2</sub> kg <sup>-1</sup> seed (maximum) | (1) Grass seed: 53–79 kg ha <sup>-1</sup> (minimum and maximum application rates)<br>(2) Legume seed: Application rate not available, assumed same rate as grass seed.<br>(3) Fall rye seed: 60-94 kg ha <sup>-1</sup> (minimum and maximum application rates) | (1) Grass seed: 28.6 to 207.8 kg CO <sub>2</sub> ha <sup>-1</sup><br>(2) Legume seed: 28.6 to 207.8 kg CO <sub>2</sub> ha <sup>-1</sup><br>(3) Fall rye seed: 6.6 to 12.2 kg CO <sub>2</sub> ha <sup>-1</sup> |
|                                                    | Tree seedling production                                                       | Lowest GHG emission estimate in [76] is used because produced on site, therefore reducing energy use [10,11].                                                                                                                                                                                                                                                                                                                                                                   | 46.71 kg CO <sub>2</sub> 1000 seedlings <sup>-1</sup> (maximum, [76])<br>23.36 kg CO <sub>2</sub> 1000 seedlings <sup>-1</sup> (minimum, assumption)                                                                                                                                                                                       | Assumed planting density of 750 stems ha <sup>-1</sup> (±10%)                                                                                                                                                                                                  | 15.8 to 38.5 kg CO <sub>2</sub> ha <sup>-1</sup>                                                                                                                                                              |
| Activity                                           | Farm operations                                                                | Various operations have different emissions, and a varying number of these were required during the revegetation process, including discing, cultivation, and harvest [10,11].                                                                                                                                                                                                                                                                                                  | 8.72 kg CO <sub>2</sub> ha <sup>-1</sup> (minimum)<br>26.75 kg CO <sub>2</sub> ha <sup>-1</sup> (maximum)                                                                                                                                                                                                                                  | A minimum of 3 farm operations occur in the first year [10,11]. Assume up to 5 are needed in subsequent years.                                                                                                                                                 | 26.2 to 214 kg CO <sub>2</sub> ha <sup>-1</sup>                                                                                                                                                               |
|                                                    | Amendment Application (Fertilizer, Lime, or Mulch)                             | At least 5 different amendments are applied in the first year, and then further applications of fertilizer and lime occur in subsequent years as needed [10,11].                                                                                                                                                                                                                                                                                                                | 12.35 kg CO <sub>2</sub> ha <sup>-1</sup>                                                                                                                                                                                                                                                                                                  | A minimum of 5 amendment applications occur. Assume up to 10 are needed in subsequent years [10,11].                                                                                                                                                           | 61.8 to 185.3 kg CO <sub>2</sub> ha <sup>-1</sup>                                                                                                                                                             |
|                                                    | Grass, legume, or fall rye seeding (Broadcast, seed drill, or Brillion seeder) | At least 3 seeding events occur in the first year, and 1 in the second year.                                                                                                                                                                                                                                                                                                                                                                                                    | 6.79 kg CO <sub>2</sub> ha <sup>-1</sup>                                                                                                                                                                                                                                                                                                   | A minimum of 4 seeding events occur. Assume up to 6 more occur in subsequent years [10,11].                                                                                                                                                                    | 27.16 to 67.9 kg CO <sub>2</sub> ha <sup>-1</sup>                                                                                                                                                             |
| Total CO <sub>2</sub> emissions (minimum, maximum) |                                                                                |                                                                                                                                                                                                                                                                                                                                                                                                                                                                                 |                                                                                                                                                                                                                                                                                                                                            |                                                                                                                                                                                                                                                                | 2425.8 to 5701.7 kg CO <sub>2</sub> ha <sup>-1</sup>                                                                                                                                                          |

<sup>1</sup> Mixture used is *Poa compressa* L. (25%), *Agrostis gigantea* Roth. (25%), *Phleum pratense* L. (15%), *Poa pratensis* L. (15%), *Festuca arundinacea* Schreb. (10%), and *Festuca rubra* L. (10%) [10,11]. In addition *Bromus intermis* Leyss. may have been applied as a single species. <sup>2</sup> Various clover (*Melilotus* spp.) used at different points in time, but the most common species used was Birds-foot trefoil (*Lotus corniculatus* L.). <sup>3</sup> Unless otherwise indicated, estimates of emissions are from [78].
